# Supplementary material for: A facile strategy to fabricate covalently linked raspberry-like nanocomposites with pH and thermo tunable structures
Source: Royal Society of Chemistry journal article supplement (doi:10.1039/c6ra03965k), 2016-01-01
Supplement: c6ra03965k1.pdf [file c6ra03965k1.pdf]

**Electronic Supplementary Information for:**  
**A facile strategy to fabricate covalently linked raspberry-like nanocomposites with pH and thermo tunable structures**

Ruiwei Guo<sup>ab</sup>, Xing Chen<sup>a</sup>, Xiaolei Zhu<sup>c</sup>, Anjie Dong<sup>a</sup>, Jianhua Zhang<sup>\* ab</sup>

<sup>a</sup> Department of Polymer Science and Engineering, School of Chemical Engineering and Technology, Tianjin University, Tianjin, 300072, China

<sup>b</sup> Tianjin Key Laboratory of Membrane Science and Desalination Technology, Tianjin University, Tianjin 300072, China

<sup>c</sup> China National Chemical Corporation, Beijing, 100080, China

Corresponding author: Jianhua Zhang

*E-mail address:* [jhuazhang@tju.edu.cn](mailto:jhuazhang@tju.edu.cn);

Tel.: +862 227 402 364; Fax: +862 227 890 710.

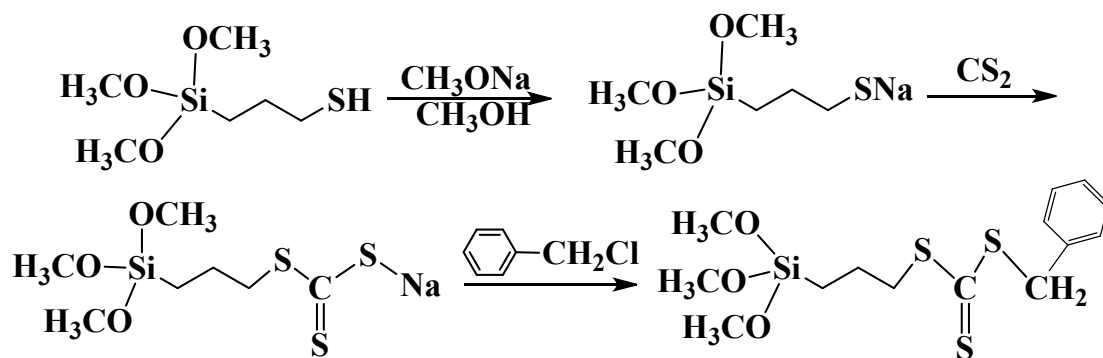

**Scheme S1.** Schematic illustration of synthesis of BTPT

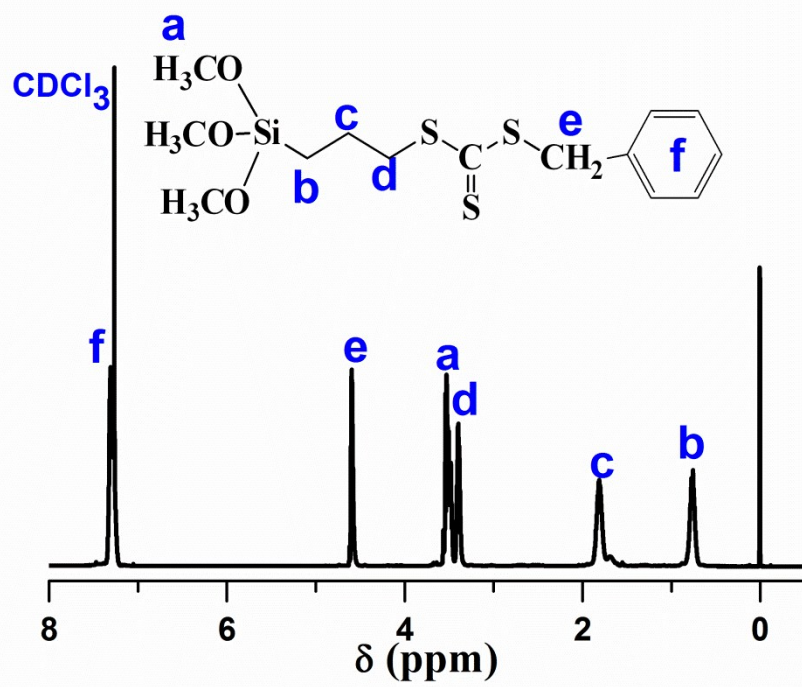

Figure S1. <sup>1</sup>H NMR spectrum of BTPT

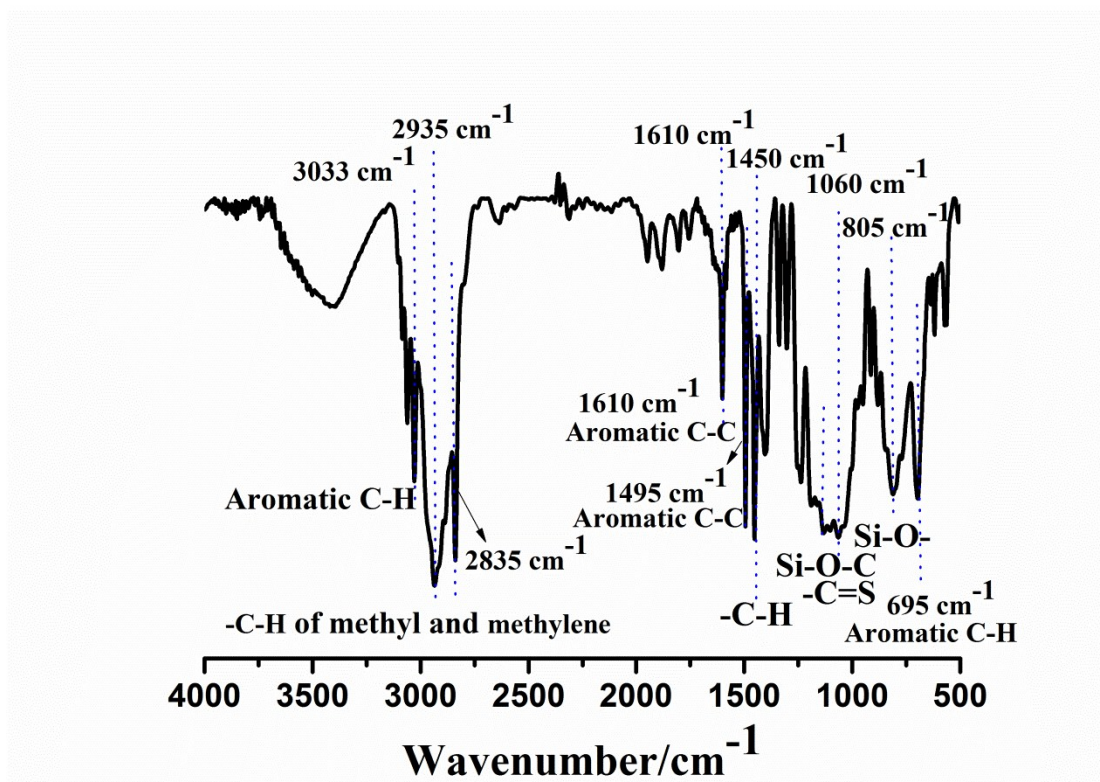

Figure S2. FTIR spectrum of BTPT

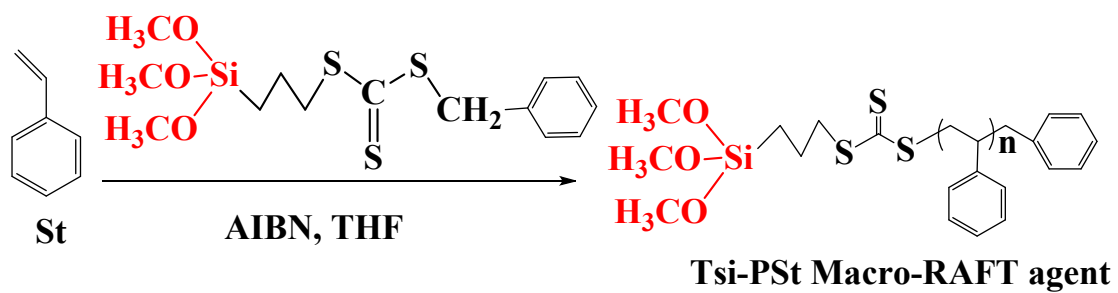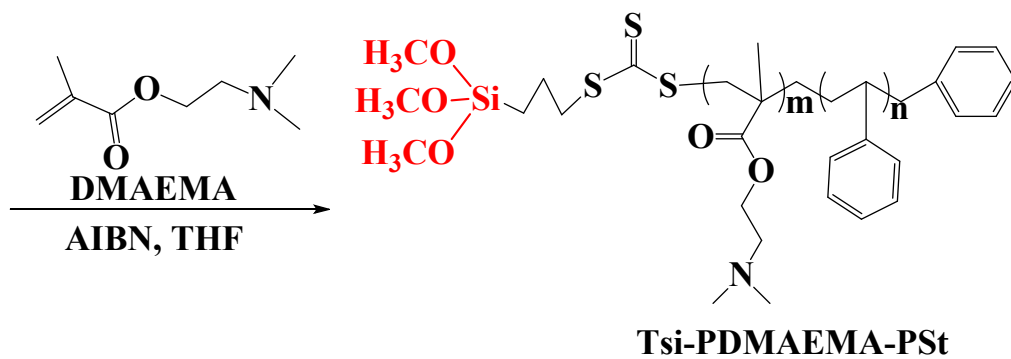

**Scheme S2.** Schematic illustration of synthesis of Tsi-PDMAEMA-PSt

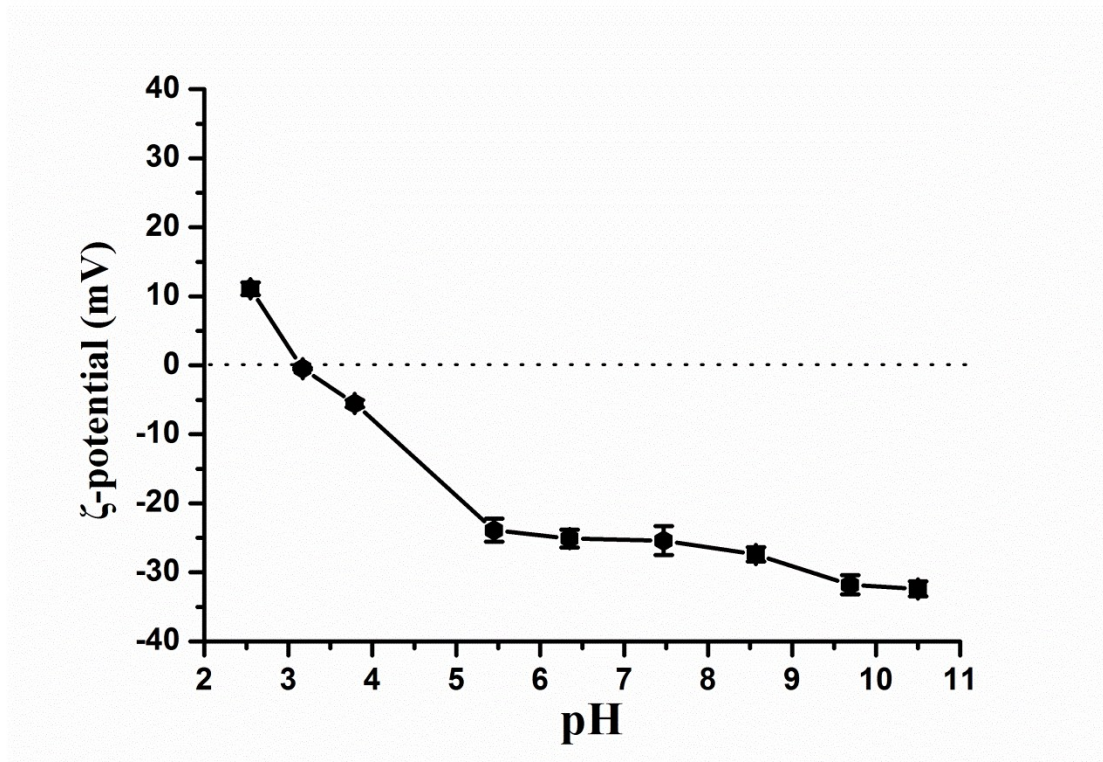

Figure S3. Zeta potential of silica particles in water at different pH values

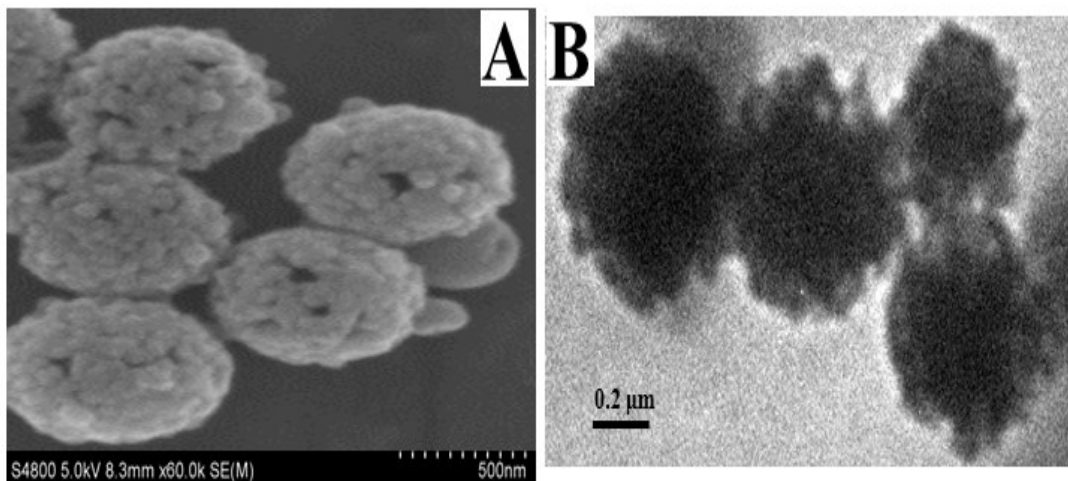

**Fi**

**Figure S4.** Typical SEM and TEM images of silica@polymer composite particles after ultrasonication treatment

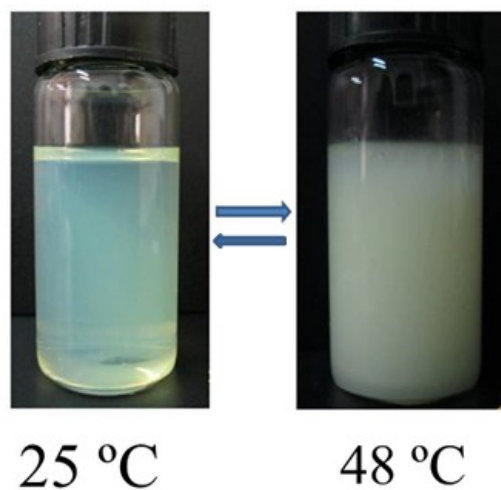

**Figure S5.** Photographs of the thermo-triggered aggregation-disaggregation transitions of silica@polymer particles at pH 7.4. Thermoresponsiveness of silica@polymer particles are due to the reversible hydrophilic-hydrophobic transitions of PDMAEMA chains triggered by temperature.



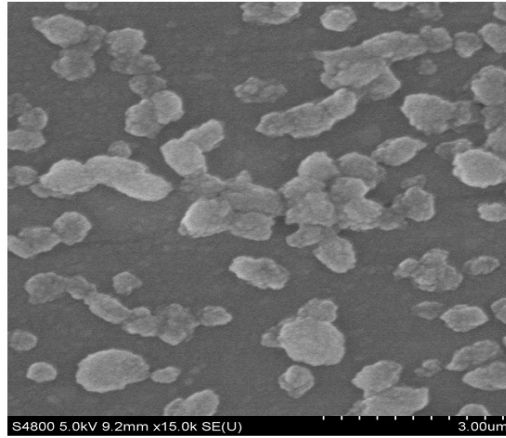

**Figure S6.** Typical SEM image of silica@polymer particles collected at 48 °C
